# Supplementary material
Source: PubMed Central journal article supplement (PMC9474599)
Supplement: NIHMS1821333-supplement-1.pdf [file NIHMS1821333-supplement-1.pdf]

## SUPPLEMENTARY FIGURES AND TABLES

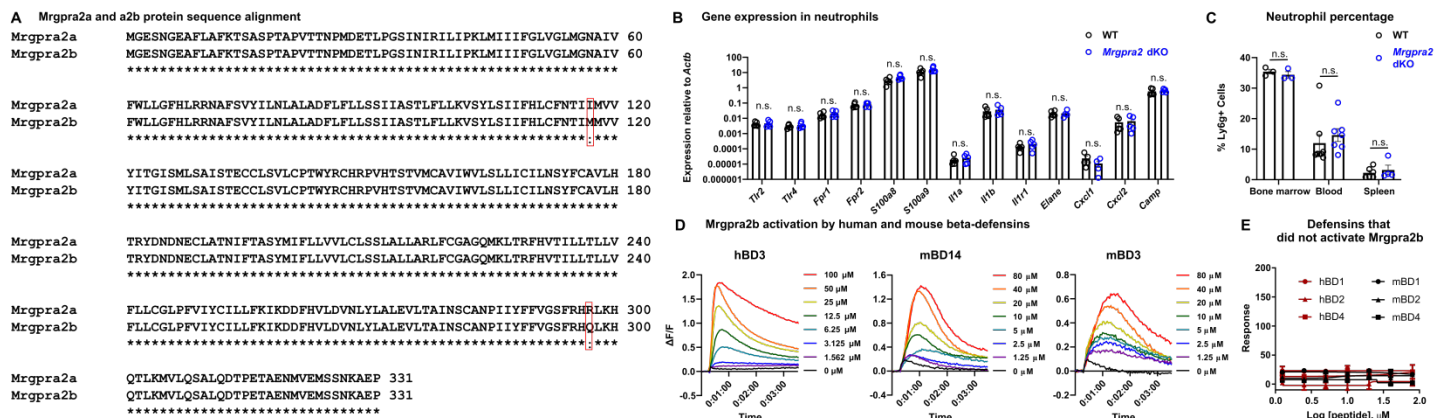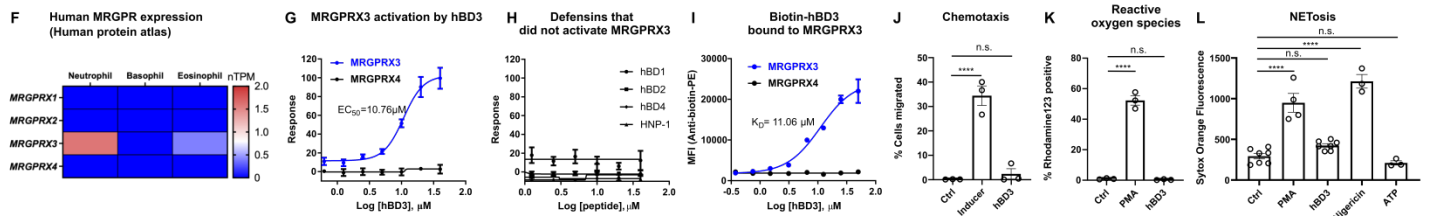

## Figure S1. Ligand-receptor interactions between defensins and Mrgpr receptors

(A) Protein sequence alignment between Mrgpra2a and Mrgpra2b by Clustal Omega. The amino acids that differ between the two proteins were highlighted in red boxes.

(B) qPCR quantifications of key genes in neutrophils purified from WT (black) or *Mrgpra2* dKO (blue) mice. The amounts of mRNA transcripts were normalized to housekeeping gene *Actb*. n=5

(C) Percentage of Ly6g<sup>+</sup> neutrophils in bone marrow, blood and spleen of WT and *Mrgpra2* dKO animals measured by flow cytometry. n=3-8

(D) Representative FLIPR Ca<sup>2+</sup> traces showing hBD3, mBD14 and mBD3 activation of Mrgpra2b. Related to Figure 1E.

(E) HEK cells expressing Mrgpra2b were not activated by human peptides hBD1, 2, 4 or mouse peptides mBD1, 2, 4 as determined by FLIPR intracellular calcium mobilization assay. n=2

(F) Heatmap showing the expression of *MRGPRX1-4* in human neutrophils, basophils and eosinophils based on the Human Protein Atlas.

(G) HEK cells expressing MRGPRX3 activation by hBD3 (EC<sub>50</sub>=10.76 μM) as determined by FLIPR intracellular calcium mobilization assay. Cells expressing MRGPRX4 were not activated and used as negative control. n=5

(H) HEK cells expressing MRGPRX3 were not activated by human beta-defensins hBD1, 2, 4 or human alpha-defensin HNP-1. n=3

(I) Dissociation constant ( $K_D=11.06\mu\text{M}$ ) between biotin-hBD3 and MRGPRX3 determined by flow cytometry. Cells expressing MRGPRX4 were used as negative control. n=3

(J) hBD3 did not trigger chemotaxis of WT neutrophils, migration inducer (Abcam) was used as positive control. n=3

(K) hBD3 did not trigger production of reactive oxygen species in WT neutrophils. PMA was used as positive control. n=3

(L) hBD3 did not trigger NETosis of purified WT neutrophils. PMA and nigericin were used as positive controls, medium and ATP were used as negative controls. n=3-7

Results are presented as mean  $\pm$  SEM from at least two independent experiments. \*\*\*\*p < 0.0001, n.s. not significant by one-way (H-J) or two-way ANOVA (B-C).

Related to Figure 1

## A Sanger sequencing of *Def* cluster deletion

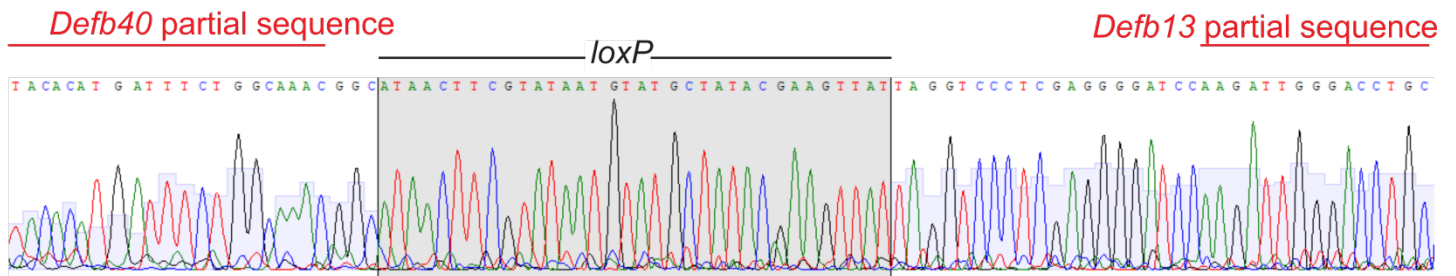

## B mRNA levels of *Defa* genes

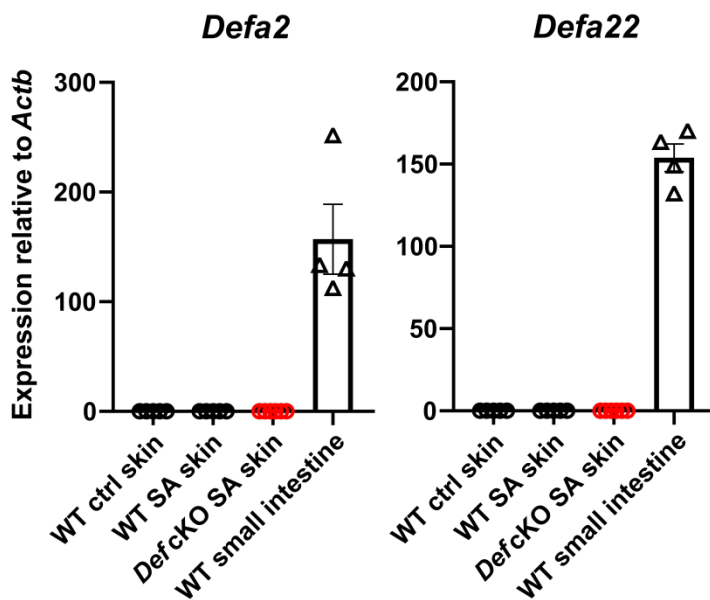

### Figure S2. Validations of the *Def* cKO mouse

(A) Sanger sequencing result of *Def* cKO deletion band showing one recombined *loxP* sequence flanked by partial sequences of *Defb40* and *Defb13* genes.

(B) Relative expressions of *Defa2* and *Defa22* in WT control skin, WT skin 24 hours post *S. aureus* infection (black circles), *Def* cKO skin 24 hours post *S. aureus* infection (red circles) and WT small intestine (black triangles). mRNA expressions were normalized to housekeeping gene *Actb*. n=4-6

Results are presented as mean  $\pm$  SEM from at least two independent experiments.

Related to Figure 2

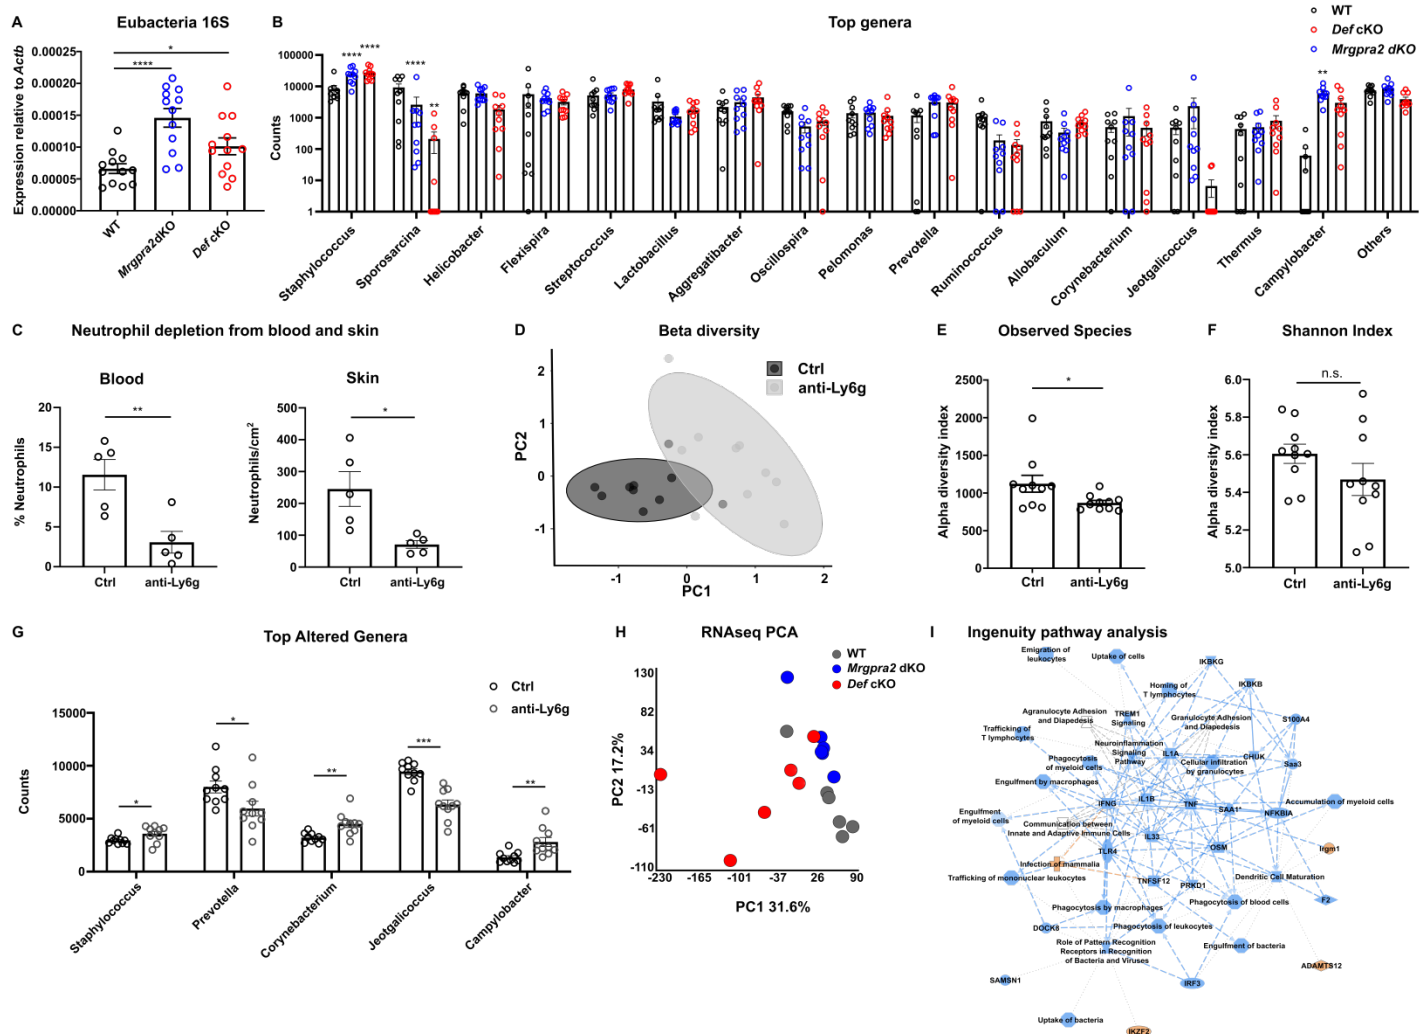

**Figure S3. Skin microbiome dysbiosis in *Mrgpra2* dKO, *Def* cKO and neutrophil depleted animals**

(A) qPCR of eubacterial 16S rRNA in WT (black), *Mrgpra2* dKO (blue) and *Def* cKO (red) skin. RNA levels were normalized to housekeeping gene *Actb*. n=12

(B) Top genera of WT (black), *Mrgpra2* dKO (blue) and *Def* cKO (red) skin microbiota.

One-way ANOVA were used to compare each mutant strain with WT. Non-significant tests were not labeled.

(C) Percentage of neutrophils in the blood and neutrophils per cm<sup>2</sup> in the skin in mice treated with control or anti-Ly6g antibody. Antibody depletion caused a 70-80% reduction in neutrophils in both blood and naïve skin. n=5

(D-G) 16S sequencing analysis of microbial communities on the skin of WT mice treated with control or anti-Ly6g antibodies for two weeks. n=10

(D) Principal coordinates analysis showing that the clustering of anti-Ly6g treated (light grey) microbial communities distinct from that of control WT (dark grey).

(E) Total numbers of bacterial species observed in control WT (dark grey) and neutrophil-depleted (anti-Ly6g-treated) (light grey) skin swab samples.

(F) Shannon indices of control WT (dark grey) and neutrophil-depleted (anti-Ly6g-treated) (light grey) skin swab samples.

(G) Top altered genera between control WT (dark grey) and neutrophil-depleted (anti-Ly6g-treated) (light grey) skin microbiota.

(H) Principal component analysis (PCA) of RNAseq results revealed differential clustering of WT (grey), *Mrgpra2* dKO (blue) and *Def* cKO (red) gene expressions.

(I) Ingenuity gene ontology pathways analysis of genes affected in both *Mrgpra2* dKO and *Def* cKO naïve skin compared to WT.

Results are presented as mean  $\pm$  SEM from at least three independent experiments for (A) and from one experiment for (B-I). \* $p < 0.05$ , \*\* $p < 0.01$ , \*\*\* $p < 0.001$ , \*\*\*\* $p < 0.0001$ , n.s. not significant by one-way ANOVA (A, B, G) or two-tailed unpaired Student's t test (C, E, F).

Related to Figure 3

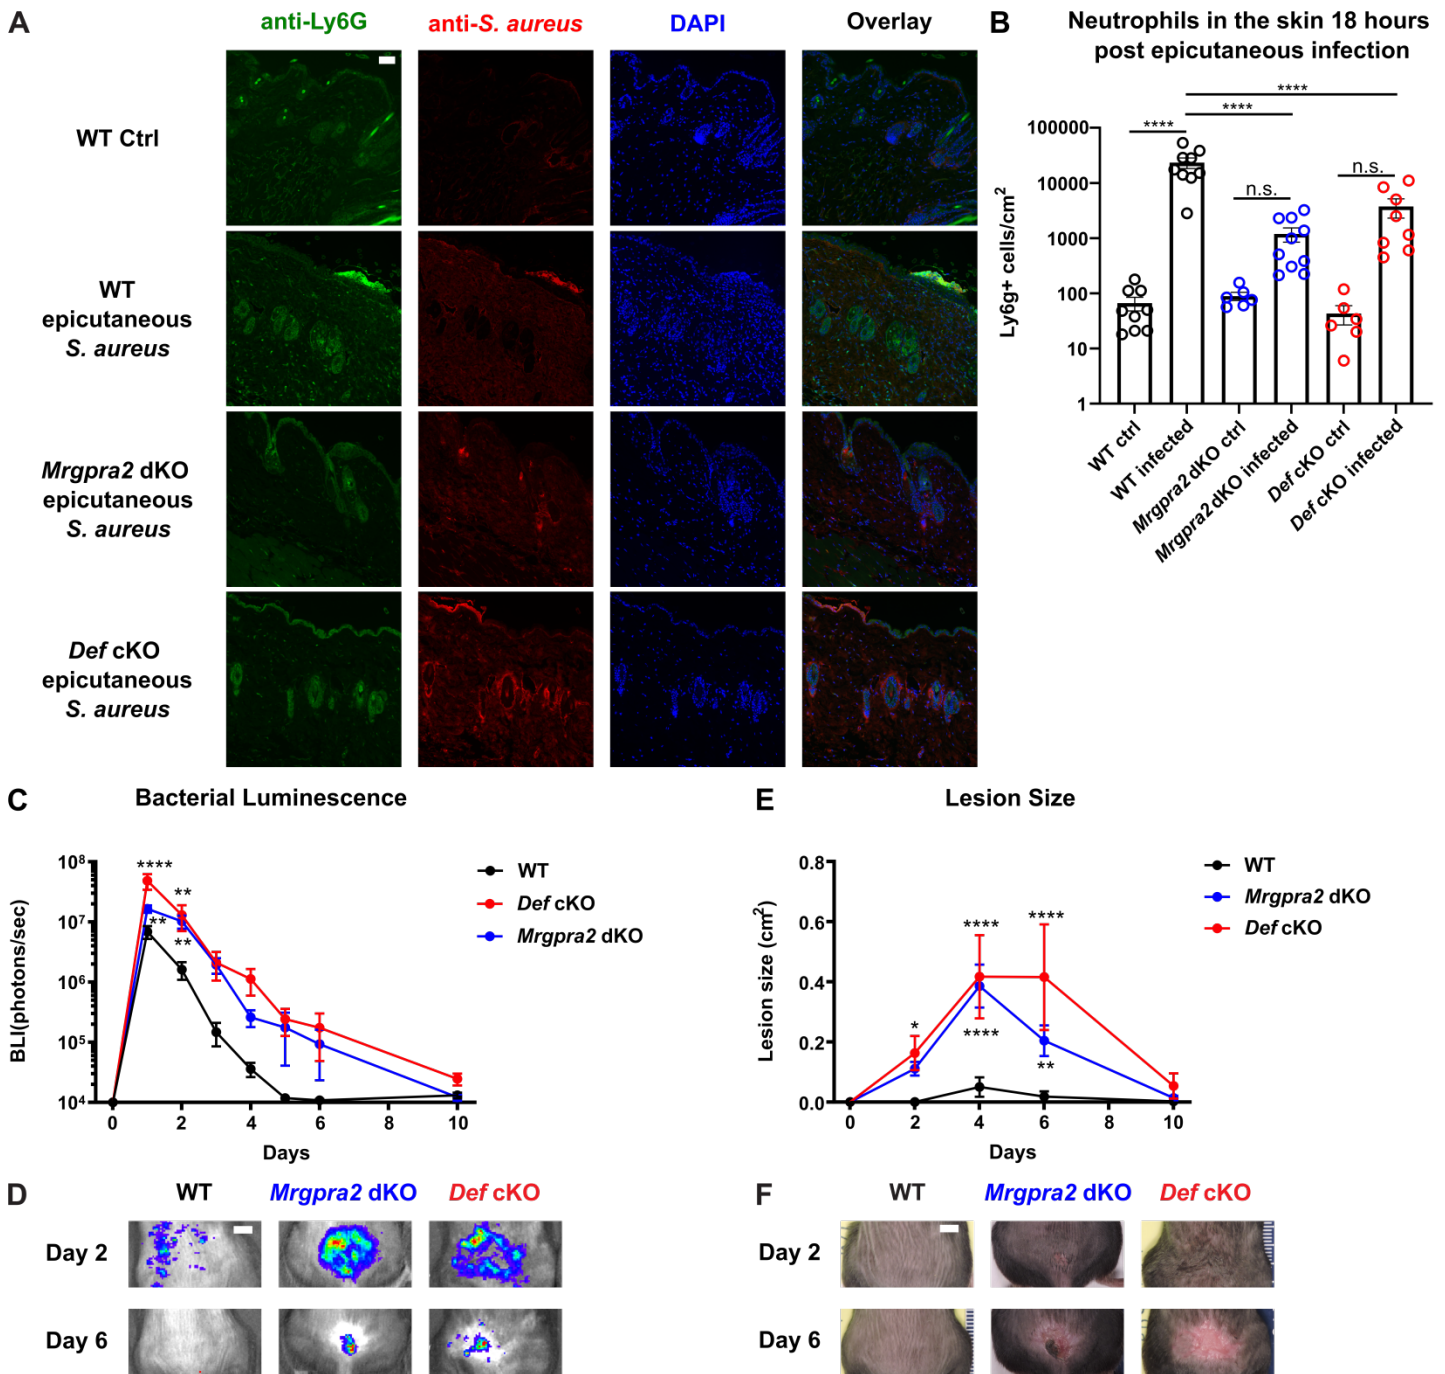

**Figure S4. *Mrgpra2* and defensins were necessary for clearing epicutaneous *S. aureus***

(A) Immunofluorescent images showing neutrophils stained with anti-Ly6G (green), *S. aureus* (red) and DAPI (blue) in WT ctrl skin (top row), and WT, *Mrgpra2* dKO, and *Def* cKO skin 18 hours post-epicutaneous *S. aureus* application (bottom three rows). A significant number of neutrophils infiltrated into the WT skin and were located close to the dermis or hair follicles where the bacteria colonize (second row, green dots in anti-Ly6G image). *Mrgpra2* dKO and *Def* cKO animals had less neutrophils infiltrating into the skin in response to the epicutaneous *S. aureus* challenge. Scale bar=100 $\mu$ m

(B) Flow cytometry analyses of neutrophils in the skin 18 hours post-epicutaneous *S. aureus* application.

Both *Mrgpra2* dKO and *Def* cKO animals showed reduced numbers of neutrophils. n=6-9

(C) Bacterial luminescence (Mean total flux [photons per second]) of WT (black, n=8), *Mrgpra2* dKO (blue, n=12) and *Def* cKO (red, n=6) back skin following epicutaneous *S. aureus* application.

(D) Representative images of in vivo bioluminescence. Scale bar=0.5cm

(E) Mean total lesion size (cm<sup>2</sup>) of WT (black), *Mrgpra2* dKO (blue) and *Def* cKO (red) back skin following epicutaneous *S. aureus* application.

(F) Representative photographs of lesions. Scale bar=0.5cm

Results are presented as mean ± SEM from at least three independent experiments. \*p < 0.05, \*\*p < 0.01, \*\*\*\*p < 0.0001, n.s. not significant by one-way ANOVA (B) or two-way ANOVA (C, E).

Related to Figure 3

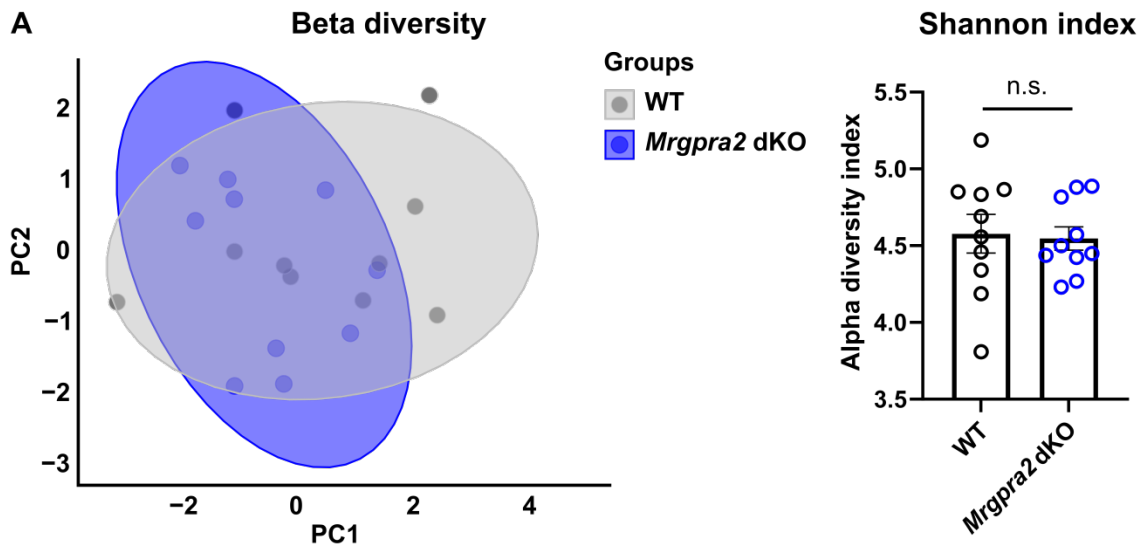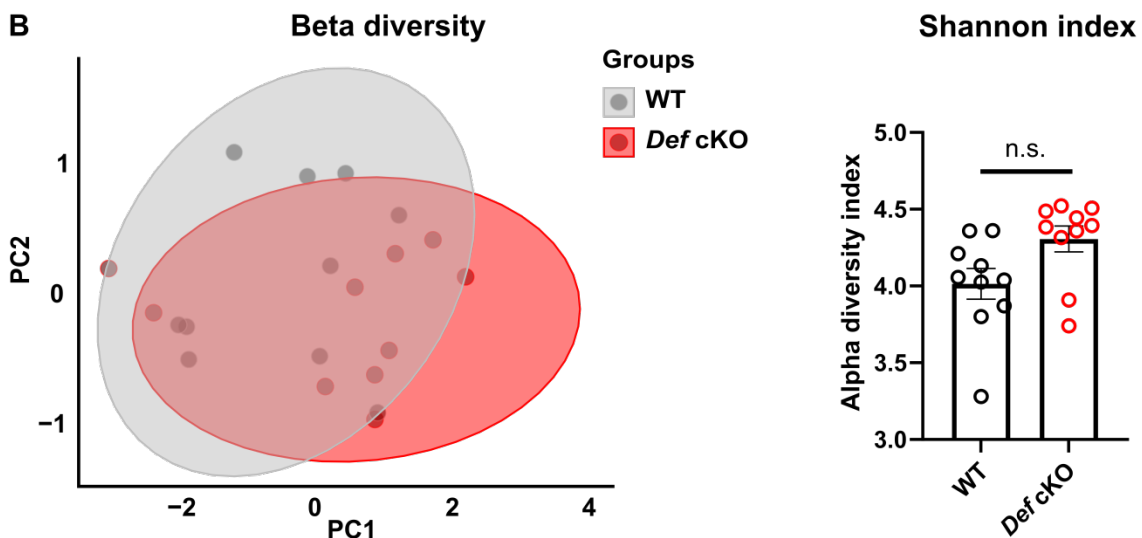

**C** **Flow cytometry gating strategy**

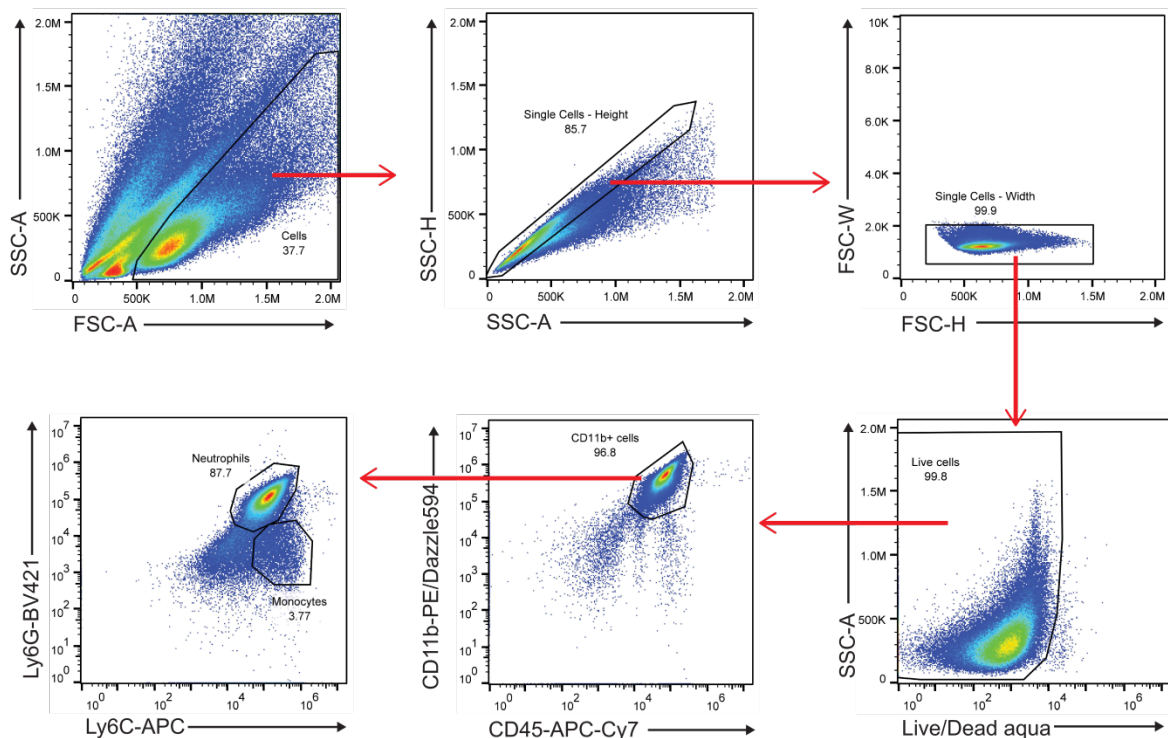



**Figure S5. Analysis of *S. aureus* infected skin**

(A-B) 16S sequencing analysis of microbial diversity on the skin of WT animals co-housed with *Mrgpra2* dKO (A) and *Def* cKO (B) mice. Animals housed together share skin microbiomes. Co-housed animals were used for all infection analyses. n=10

(C) Gating strategy for flow cytometry analyses of skin samples.

Results are presented as mean  $\pm$  SEM from one experiment. n.s. not significant by two-tailed unpaired Student's t test.

Related to Figures 4 and 5



**A** ELISA quantification of IL-1 $\beta$  and Cxcl2 in *S. aureus*-infected skin

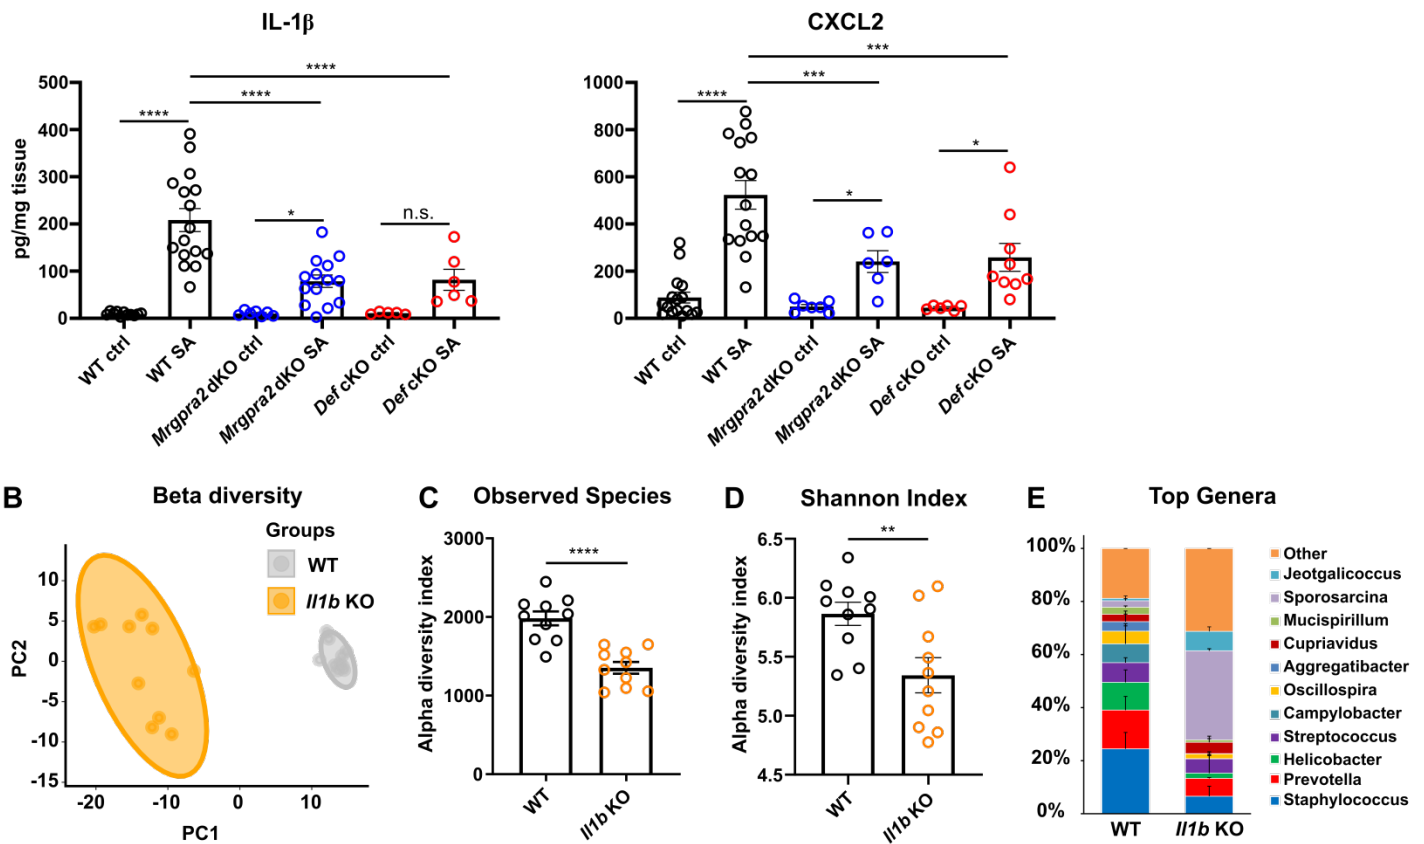

**Figure S7. IL-1 $\beta$  and Cxcl2 were downstream of defensin-Mrgpra2 signaling**

(A) ELISA quantifications of protein levels of IL-1 $\beta$  and Cxcl2 in the skin of WT, *Def cKO*, and *Mrgpra2 dKO* mice 24 hours post *S. aureus* infection. n=5-16

(B-E) Skin dysbiosis in *Il1b KO* animals. n=10

(B) Principal coordinates analysis showing the clustering of *Il1b KO* (yellow) and WT (grey) microbiota.

(C) Total numbers of bacterial species observed in WT (black) and *Il1b KO* (yellow) skin samples.

(D) Shannon indices of WT (black) and *Il1b KO* (yellow) skin swab samples.

(E) Stacked bar charts depicting the relative abundance of top genera in WT and *Il1b KO* skin microbiota.

Results are presented as mean  $\pm$  SEM from at least three independent experiments for (A) and from one experiment for (B-E). \*p<0.05, \*\*p < 0.01, \*\*\*p < 0.001, \*\*\*\*p < 0.0001, n.s. not significant by one-way ANOVA in (A) and by two-tailed unpaired Student's t test in (B-D).

Related to Figure 6 and Figure 7

**Table S1. Flow cytometry and FACS panels, related to the STAR methods section**

| <b>Tissue Types</b>             | <b>Antigen</b> | <b>Fluorochrome</b> | <b>Company</b> | <b>Catalog #</b> | <b>Clone</b> |
|---------------------------------|----------------|---------------------|----------------|------------------|--------------|
| <b><u>Skin</u></b>              |                | Live/Dead Aqua      | Thermo Fisher  | L34966           |              |
|                                 | CD45           | APC-Cy7             | Biolegend      | 103116           | 30-F11       |
|                                 | CD11b          | PE/Dazzle594        | Biolegend      | 101256           | M1/70        |
|                                 | CD11c          | PE/Cy7              | Biolegend      | 117318           | N418         |
|                                 | Ly6C           | APC                 | Biolegend      | 128016           | HK1.4        |
|                                 | Ly6G           | BV421               | Biolegend      | 127628           | 1A8          |
|                                 | F4/80          | BV605               | Biolegend      | 123133           | BM8          |
|                                 | Siglec F       | BB515               | BD Bioscience  | 564514           | E50-2440     |
| <b><u>Peritoneal Lavage</u></b> |                |                     |                |                  |              |
| <b>Mast cells</b>               |                | Sytox Red           | Thermo Fisher  | S34859           |              |
|                                 | c-Kit          | BV421               | Biolegend      | 135124           | ACK2         |
|                                 | ICAM           | FITC                | Biolegend      | 116105           | YN/1.7.4     |
|                                 | F4/80          | PE                  | Biolegend      | 123110           | BM8          |
|                                 | FcεRI          | PE/Cy7              | Biolegend      | 134318           | MAR-1        |
| <b>Macrophages</b>              |                | Sytox Red           | Thermo Fisher  | S34859           |              |
|                                 | Ly6G           | BV421               | Biolegend      | 127628           | 1A8          |
|                                 | ICAM           | FITC                | Biolegend      | 116105           | YN/1.7.4     |
|                                 | F4/80          | PE                  | Biolegend      | 123110           | BM8          |
|                                 | CD11b          | BV785               | Biolegend      | 101243           | M1/70        |
| <b><u>Spleen</u></b>            |                |                     |                |                  |              |
| <b>Dendritic cells</b>          |                | Sytox Blue          | Thermo Fisher  | S34857           |              |
|                                 | CD11c          | BV605               | Biolegend      | 117334           | N418         |
|                                 | B220           | APC                 | eBioscience    | 17-0452-82       | RA3-6B2      |
|                                 | I-A/I-E        | BV711               | Biolegend      | 107643           | M5/114.15.2  |
|                                 | Ly6G           | PE/Cy7              | Biolegend      | 127617           | 1A8          |
| <b><u>Peripheral Blood</u></b>  |                |                     |                |                  |              |
| <b>Monocytes</b>                |                | Sytox Blue          | Thermo Fisher  | S34857           |              |
|                                 | CD11b          | PE                  | Biolegend      | 101207           | M1/70        |

|                           |                  |           |               |            |          |
|---------------------------|------------------|-----------|---------------|------------|----------|
|                           | B220             | APC       | eBioscience   | 17-0452-82 | RA3-6B2  |
|                           | Ly6G             | AF700     | Biolegend     | 127622     | 1A8      |
|                           | TCR $\beta$      | BV785     | Biolegend     | 109249     | H57-597  |
| <b>Eosinophils</b>        |                  | Sytox Red | Thermo Fisher | S34859     |          |
|                           | Ly6G             | BV421     | Biolegend     | 127628     | 1A8      |
|                           | SiglecF          | BB515     | BD Bioscience | 564514     | E50-2440 |
|                           | CD49b            | PE        | Biolegend     | 108908     | DX5      |
|                           | CD11b            | BV785     | Biolegend     | 101243     | M1/70    |
| <b><u>Bone Marrow</u></b> |                  |           |               |            |          |
| <b>Neutrophils</b>        |                  | Sytox Red | Thermo Fisher | S34859     |          |
|                           | Ly6G             | BV421     | Biolegend     | 127628     | 1A8      |
|                           | SiglecF          | BB515     | BD Bioscience | 564514     | E50-2440 |
|                           | CD49b            | PE        | Biolegend     | 108908     | DX5      |
|                           | CD11b            | BV785     | Biolegend     | 101243     | M1/70    |
| <b>Basophils</b>          |                  | Sytox Red | Thermo Fisher | S34859     |          |
|                           | c-Kit            | BV421     | Biolegend     | 135124     | ACK2     |
|                           | SiglecF          | BB515     | BD Bioscience | 564514     | E50-2440 |
|                           | CD49b            | PE        | Biolegend     | 108908     | DX5      |
|                           | Fc $\epsilon$ RI | PE/Cy7    | Biolegend     | 134318     | MAR-1    |
